# Supplementary material for: Clinical characteristics in patients with non-alcoholic steatohepatitis in Japan: a case–control study using a 5-year large-scale claims database
Source: PubMed Central journal article supplement — BMJ Open. 2023 Aug 22;13(8):e074851. doi: 10.1136/bmjopen-2023-074851 (PMC10445376; doi:10.1136/bmjopen-2023-074851), 2023-08-22
Supplement: bmjopen-2023-074851supp001.pdf [file bmjopen-2023-074851supp001.pdf]

## Supplementary Information

Supplemental Table 1. ICD-10 codes for definition of comorbidity complexes

| Comorbidity                     | ICD-10 codes                                                                                     |
|---------------------------------|--------------------------------------------------------------------------------------------------|
| Hypertension                    | I10 - I15                                                                                        |
| Dyslipidemia                    | E780 - E785                                                                                      |
| Type 2 diabetes                 | E11                                                                                              |
| Osteoporosis                    | M80 - M82                                                                                        |
| Insomnia                        | G470                                                                                             |
| Depression                      | F30 - F39                                                                                        |
| Hepatic cirrhosis               | K743 - K746                                                                                      |
| Liver cancer                    | C22                                                                                              |
| Colon cancer                    | C18                                                                                              |
| Cancer                          | C00 - C96, D00 - D48, D370 - D386, D390 - D392, D397, D399, D410 - D414, D417, D419, D440 - D449 |
| Colorectal adenomas             | D126                                                                                             |
| Chronic kidney disease          | N18                                                                                              |
| Gastroesophageal reflux disease | K21                                                                                              |
| Cardiovascular disease          | I20 - I25, I60 - I69                                                                             |
| Sleep apnea syndrome            | G473                                                                                             |

Supplemental Table 2. Baseline patient demographics and characteristics for NASH and non-NASH group

|                                                               | NASH group<br>N=545 |               | non-NASH group<br>N=185,264 |               | <i>p</i> -value |        |
|---------------------------------------------------------------|---------------------|---------------|-----------------------------|---------------|-----------------|--------|
| Age years; Median (IQR)                                       | 68                  | (63.00-75.00) | 65                          | (44.00-74.00) | <0.001          |        |
| Gender n (%)                                                  |                     |               |                             |               |                 |        |
| Male                                                          | 209                 | (38.3%)       | 80,051                      | (43.2%)       | 0.022           |        |
| Female                                                        | 336                 | (61.7%)       | 105,213                     | (56.8%)       |                 |        |
| Death n (%)                                                   | 24                  | (4.4%)        | 6,696                       | (3.6%)        | 0.300           |        |
| Prescribed drugs for treatment of NASH during analysis period |                     |               |                             |               |                 |        |
|                                                               | Pioglitazone        | 16            | (2.9%)                      | 1,600         | (0.9%)          | <0.001 |
| Type 2 diabetes                                               | GLP1 agonist        | 18            | (3.3%)                      | 794           | (0.4%)          | <0.001 |
|                                                               | SGLT2               | 61            | (11.2%)                     | 2,851         | (1.5%)          | <0.001 |
| Dyslipidemia                                                  | Statins             | 290           | (53.2%)                     | 39,692        | (21.4%)         | <0.001 |
| Hypertension                                                  | ARB                 | 250           | (45.9%)                     | 41,202        | (22.2%)         | <0.001 |
|                                                               | ACEi                | 34            | (6.2%)                      | 5,220         | (2.8%)          | <0.001 |
| None                                                          | Vitamin E           | 66            | (12.1%)                     | 5,057         | (2.7%)          | <0.001 |

NASH, nonalcoholic steatohepatitis; IQR, Interquartile range; GLP1, Glucagon-like peptide-1; SGLT2, Sodium-glucose cotransporter 2; ARB, Angiotensin II receptor blocker; ACEi, Angiotensin converting enzyme inhibitor.

Supplemental Table 3. Risk adjusted odds ratio with NASH onset and NASH-related comorbidities relationship.

|                   | Hepatic cirrhosis    |               | Liver cancer            |               | Gastroesophageal reflux diseases |             | Colorectal adenomas |             | Colon cancer |             | Cancer                  |             |
|-------------------|----------------------|---------------|-------------------------|---------------|----------------------------------|-------------|---------------------|-------------|--------------|-------------|-------------------------|-------------|
|                   | OR (95%CI)           |               | OR (95%CI)              |               | OR (95%CI)                       |             | OR (95%CI)          |             | OR (95%CI)   |             | OR (95%CI)              |             |
| NASH vs. non-NASH | 28.81                | (21.79-38.08) | 18.38                   | (12.56-26.89) | 3.08                             | (2.53-3.73) | 2.54                | (1.25-5.16) | 2.36         | (1.70-3.28) | 2.16                    | (1.79-2.62) |
| Gender (female)   | 0.70                 | (0.60-0.81)   | 0.45                    | (0.37-0.55)   | 0.92                             | (0.90-0.94) | 0.41                | (0.35-0.49) | 0.62         | (0.59-0.66) | 0.57                    | (0.55-0.59) |
| Age               | 1.04                 | (1.03-1.04)   | 1.06                    | (1.05-1.07)   | 1.04                             | (1.04-1.04) | 1.02                | (1.02-1.03) | 1.05         | (1.05-1.05) | 1.05                    | (1.05-1.05) |
| Hypertension      | 1.78                 | (1.45-2.19)   | 1.31                    | (1.03-1.67)   | 1.90                             | (1.85-1.95) | 1.54                | (1.25-1.90) | 1.36         | (1.25-1.47) | 1.22                    | (1.17-1.26) |
| Dyslipidemia      | 0.73                 | (0.62-0.86)   | 0.86                    | (0.70-1.04)   | 1.72                             | (1.68-1.76) | 1.72                | (1.45-2.05) | 1.1          | (1.03-1.18) | 1.08                    | (1.04-1.11) |
| Type 2 diabetes   | 2.15                 | (1.82-2.54)   | 2.56                    | (2.10-3.13)   | 1.58                             | (1.54-1.63) | 1.46                | (1.23-1.74) | 1.62         | (1.51-1.74) | 1.69                    | (1.63-1.75) |
|                   | Sleep apnea syndrome |               | Cardiovascular diseases |               | Osteoporosis                     |             | Depression          |             | Insomnia     |             | Chronic kidney diseases |             |
|                   | OR (95%CI)           |               | OR (95%CI)              |               | OR (95%CI)                       |             | OR (95%CI)          |             | OR (95%CI)   |             | OR (95%CI)              |             |
| NASH vs. non-NASH | 1.82                 | (1.20-2.76)   | 1.40                    | (1.16-1.69)   | 1.25                             | (1.02-1.53) | 1.11                | (0.87-1.41) | 1.12         | (0.94-1.34) | 0.81                    | (0.58-1.12) |
| Gender (female)   | 0.34                 | (0.31-0.37)   | 0.74                    | (0.72-0.76)   | 6.68                             | (6.47-6.91) | 1.43                | (1.38-1.48) | 1.35         | (1.31-1.38) | 0.58                    | (0.56-0.61) |
| Age               | 1.00                 | (1.00-1.00)   | 1.07                    | (1.07-1.07)   | 1.08                             | (1.07-1.08) | 1.02                | (1.02-1.02) | 1.04         | (1.03-1.04) | 1.06                    | (1.05-1.06) |
| Hypertension      | 3.19                 | (2.80-3.62)   | 2.99                    | (2.90-3.07)   | 1.50                             | (1.45-1.55) | 1.32                | (1.27-1.38) | 1.78         | (1.73-1.83) | 4.33                    | (4.00-4.68) |
| Dyslipidemia      | 2.02                 | (1.84-2.22)   | 2.08                    | (2.03-2.13)   | 1.68                             | (1.64-1.73) | 1.24                | (1.19-1.28) | 1.38         | (1.34-1.41) | 1.35                    | (1.29-1.41) |
| Type 2 diabetes   | 1.57                 | (1.43-1.72)   | 1.78                    | (1.72-1.83)   | 1.23                             | (1.18-1.27) | 1.22                | (1.17-1.27) | 1.32         | (1.29-1.36) | 2.08                    | (1.99-2.18) |

NASH, nonalcoholic steatohepatitis; OR, odds ratio; CI, confidence interval

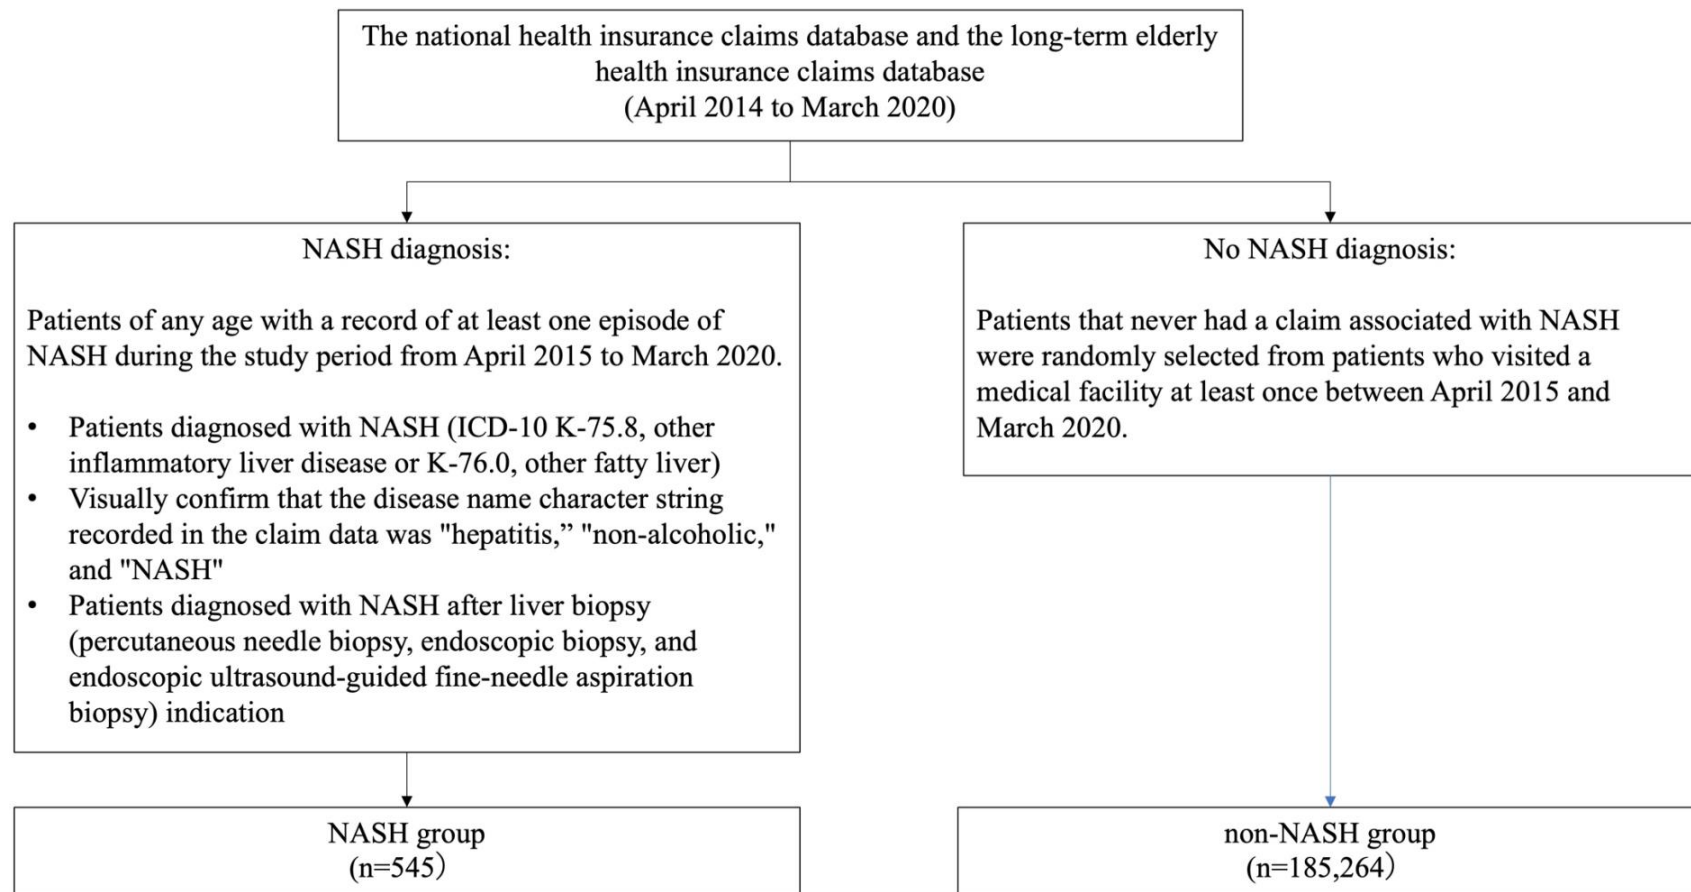

Supplemental Figure 1. Flowchart of case-control selection of patients with NASH from the national health insurance and the long-term elderly health insurance claims database in Japan.
